# Supplementary material for: Metal-directed topological diversity of three fluorescent metal–organic frameworks based on a new tetracarboxylate strut
Source: Royal Society of Chemistry journal article supplement (doi:10.1039/c3ce40443a), 2013-01-01
Supplement: c3ce40443a.pdf [file c3ce40443a.pdf]

## Supplementary Information

### Metal-directed topological diversity of three fluorescent metal-organic frameworks based on a new tetracarboxylate strut

Xin-Hua Lou,<sup>a</sup> Chen Xu,\*<sup>a</sup> Hong-Mei Li,<sup>a</sup> Zhi-Qiang Wang,<sup>a</sup> Hui Guo,<sup>a</sup> and Dong-Xu Xue\*<sup>b</sup>

<sup>a</sup>*College of Chemistry and Chemical Engineering, Luoyang Normal University, Luoyang, Henan 471022, China. E-mail: xubohan@163.com*

<sup>b</sup>*Advanced Membranes & Porous Materials Center, Division of Physical Sciences and Engineering, 4700 King Abdullah University of Science and Technology (KAUST), Thuwal 23955-6900, Kingdom of Saudi Arabia. E-mail: dongxu.xue@kaust.edu.sa*

2,4,4',6-tetramethylbiphenyl

#### Materials and Methods

All reagents were purchased from commercial sources and used without further purification. 2,4,4',6-Tetramethylbiphenyl was purchased from Jinan Henghua Sci. & Tec. Co. Ltd. Fourier-transform infrared (FT-IR) spectra (4000-600 cm<sup>-1</sup>) were collected in the solid state on a Varian 800 FT-IR spectrometer. Elemental analyses (C, H, and N) were carried out on a FLASH 2000 elemental analyzer. Powder X-ray Diffraction (PXRD) measurements were performed on a D8-ADVANCE X-ray diffractometer at 45 kV, 40mA for CuK $\alpha$  ( $\lambda$  = 1.5418 Å). High resolution dynamic thermogravimetric analysis (TGA) were performed under N<sub>2</sub> and recorded on a SDT Q600 Thermogravimetric Analyzer with a heating rate of 5 °C per minute. The luminescence spectra for the powdered solid samples were measured at room temperature on a Hitachi F-4500 Fluorescence Spectrophotometer.

## Experimental Section

### Synthesis of [1,1'-biphenyl]-2,4,4',6-tetracarboxylic acid (H<sub>4</sub>BPTC)

The mixture of 2,4,4',6-Tetramethylbiphenyl (0.10 mol, 21.0 g), KOH (0.40 mol, 22.4 g), and 1000 mL H<sub>2</sub>O was heated to reflux. KMnO<sub>4</sub> (1.28 mol, 201.6 g) was added in portions to the refluxing solution. Refluxing was continued until 2,4,4',6-Tetramethylbiphenyl was completely oxidized. After cooling to room temperature, the mixture was filtered and the residual manganese dioxide was washed with the solution of hydroxide sodium. The combined filtrates were acidified with concentrated hydrochloric acid. The white solid precipitate was filtered off, washed several times with water, and dried to afford H<sub>4</sub>BPTC (yield of 62 %). EI-MS: *m/z* [M-H]<sup>-</sup>, 329.04 (calcd for C<sub>16</sub>H<sub>10</sub>O<sub>8</sub>, 330.04). Anal. (%) calcd. for C<sub>16</sub>H<sub>10</sub>O<sub>8</sub> C, 58.19; H, 3.05. Found: C, 58.12; H, 2.97. IR (cm<sup>-1</sup>): 3108, 1693, 1604, 1568, 1414, 1376, 1289, 1163, 1005, 915, 783, 728, 703.

### Synthesis of Zn<sub>2</sub>(BPTC) (1):

A mixture of Zn(NO<sub>3</sub>)<sub>2</sub>·6H<sub>2</sub>O (29.75 mg, 0.1 mmol), and H<sub>4</sub>BPTC (33.01 mg, 0.1 mmol) in 8 mL H<sub>2</sub>O and 2ml NaOH(1mmol/ml, 0.2mmol) was sealed in a 25 mL Teflon-lined stainless steel container and heated at 180 °C for 12 days. After the mixture cooled to room temperature at a rate of 2 °C/h, colorless block crystals of **1** were obtained with a yield of 32% (based on Zn). Anal. calcd for C<sub>16</sub> H<sub>6</sub> O<sub>8</sub> Zn<sub>2</sub> (%): C, 42.05; H, 1.33. Found: C, 42.17; H, 1.31. IR (cm<sup>-1</sup>): 3055, 2930, 1605, 1532, 1368, 1182, 1004, 920, 868, 799, 768, 727, 702.

### Synthesis of [Cd<sub>2</sub>(BPTC)(H<sub>2</sub>O)<sub>3</sub>]·(H<sub>2</sub>O) (2):

A mixture of Cd(NO<sub>3</sub>)<sub>2</sub>·4H<sub>2</sub>O (30.85 mg, 0.1 mmol), and H<sub>4</sub>BPTC (33.01 mg, 0.1 mmol) in 8 mL H<sub>2</sub>O and 2ml NaOH(1mmol/ml, 0.2mmol) was sealed in a 25 mL Teflon-lined stainless steel container and heated at 160 °C for 4 days. After the mixture cooled to room temperature at a rate of 2 °C/h, colorless block crystals of **2** were obtained with a yield of 46% (based on Cd). Anal. calcd for C<sub>16</sub>H<sub>14</sub> O<sub>12</sub>Cd<sub>2</sub> (%): C, 30.84; H, 2.27. Found: C, 30.96; H, 2.28. IR (cm<sup>-1</sup>): 3567, 2450, 2362, 1652, 1580, 1521, 1427, 1397, 1362, 1005, 948, 921, 855, 781, 737, 707.

### Synthesis of [Pb<sub>2</sub>(BPTC)(DMA)<sub>4</sub>] (3):

A mixture of  $\text{Pb}(\text{NO}_3)_2$  (99.36 mg, 0.3 mmol), and  $\text{H}_4\text{BPTC}$  (33.01 mg, 0.1 mmol) in 10 mL DMA was sealed in a 25 mL Teflon-lined stainless steel container and heated at 110 °C for 7 days. After the mixture cooled to room temperature at a rate of 2 °C/h, colorless block crystals of **3** were obtained with a yield of 37% (based on Pb). Anal. calcd for  $\text{C}_{32}\text{H}_{42}\text{N}_4\text{O}_{12}\text{Pb}_2$  (%): C, 35.29; H, 3.90; N, 5.15. Found: C, 35.35; H, 3.91; N, 5.14. IR ( $\text{cm}^{-1}$ ): 3458, 2934, 1628, 1508, 1394, 1359, 1263, 1147, 1045, 1015, 961, 853, 827, 770, 709.

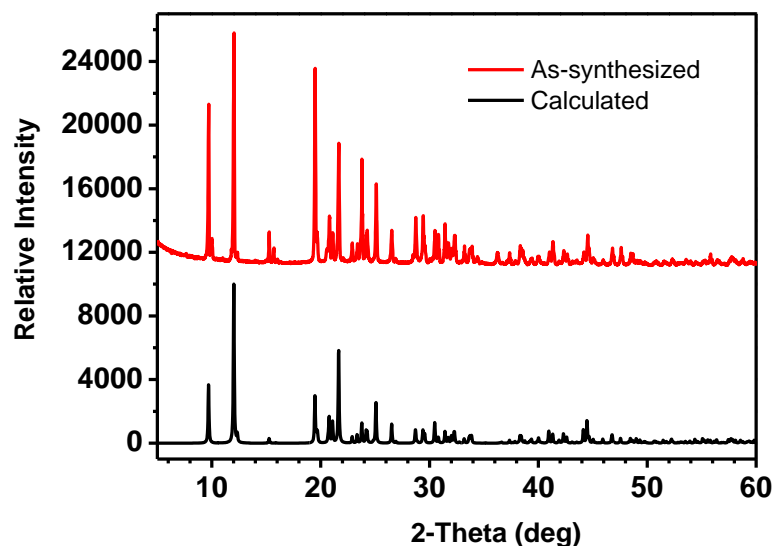

**Fig. S1** PXRD patterns of calculated and as-synthesized compound **1**, confirming the purity of bulk samples.

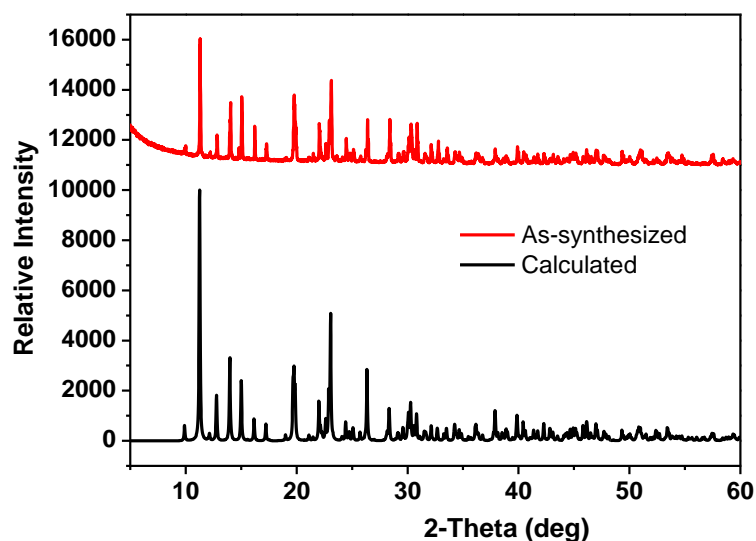

**Fig. S2** PXRD patterns of calculated and as-synthesized compound **2**, confirming the purity of bulk samples.

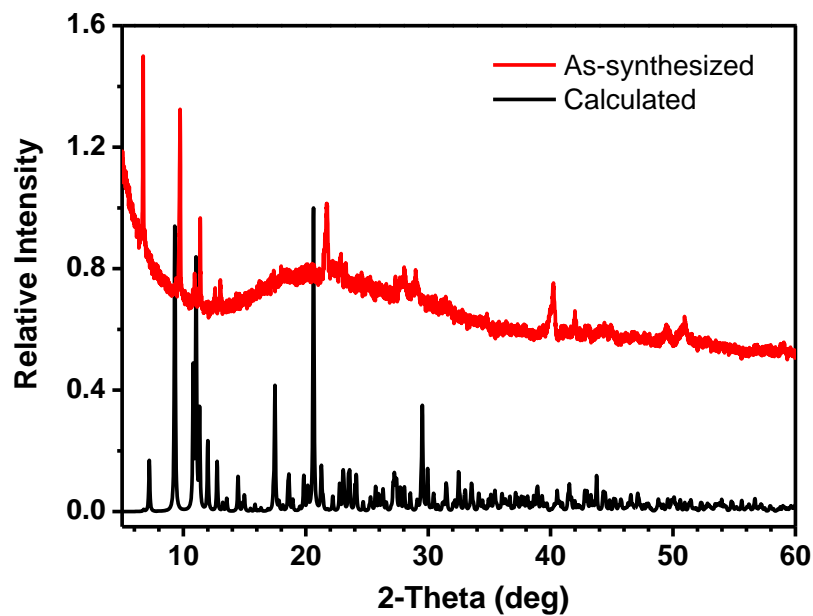

**Fig. S3** PXRD patterns of calculated and as-synthesized compound **3**, confirming the purity of bulk samples.

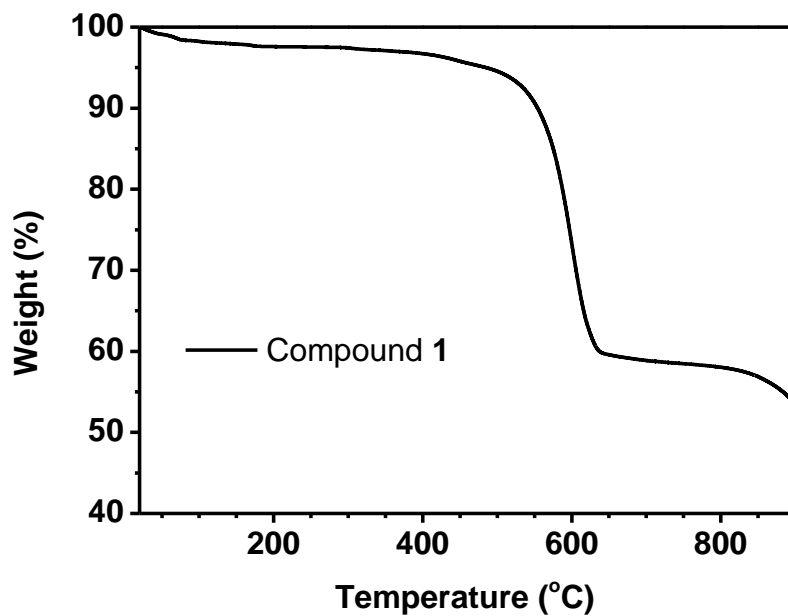

**Fig. S4** TGA plot of compound **1**, which shows that **1** can be stable up to at least 400 °C. The weight loss at the beginning of plot is due to the moisture in the air.

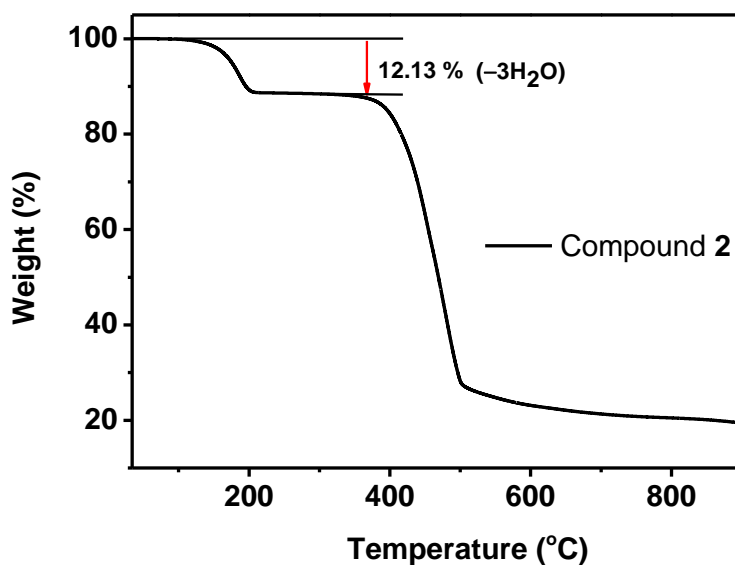

**Fig. S5** TGA plot of compound **2**, which shows that **2** can be stable up to 360 °C. The weight loss of 12.13% (theoretical, 11.56%) is corresponding to the one guest and three coordinated water molecules of one unit cell. Because the strong hydrogen bonds (O8...O12 = 2.762 Å, O9...O12 = 2.814 Å, O10...O12 = 2.717 Å), free water molecules are also releasing at higher temperature.

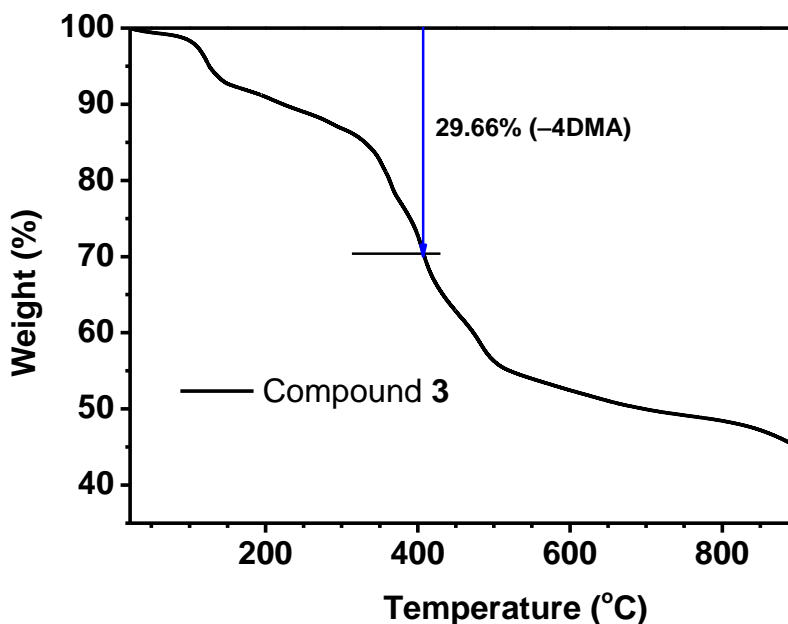

**Fig. S6** TGA plot of compound **3**. The weight loss of 29.66% (theoretical, 31.96%) is corresponding to the releasing of coordinated four DMA solvent ligands in **3** of one unit cell.

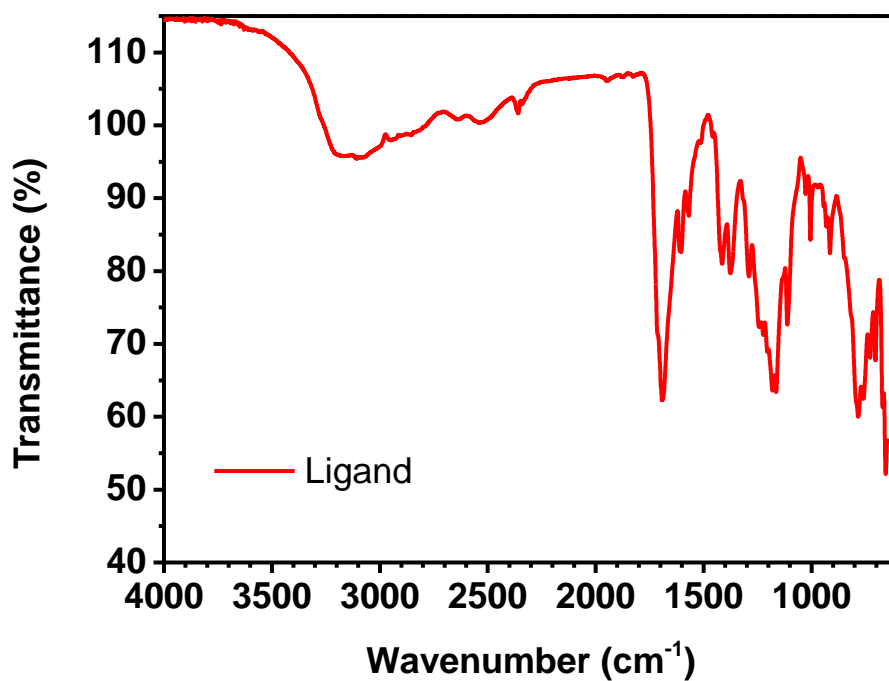

Fig. S7 FTIR spectrum of ligand H<sub>4</sub>BPTC.

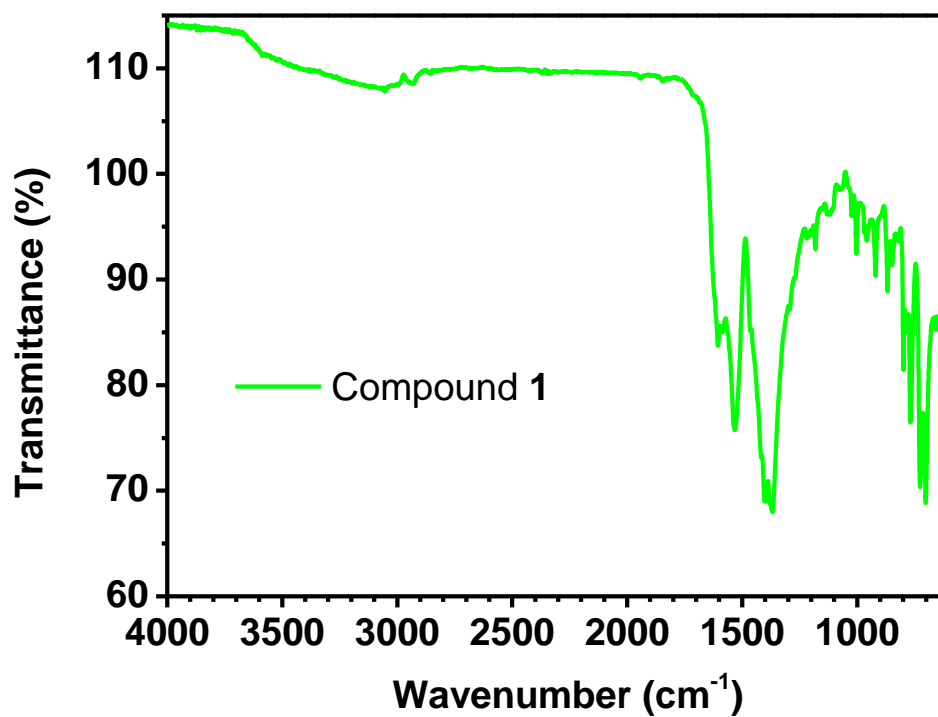

Fig. S8 FTIR spectrum of compound 1.

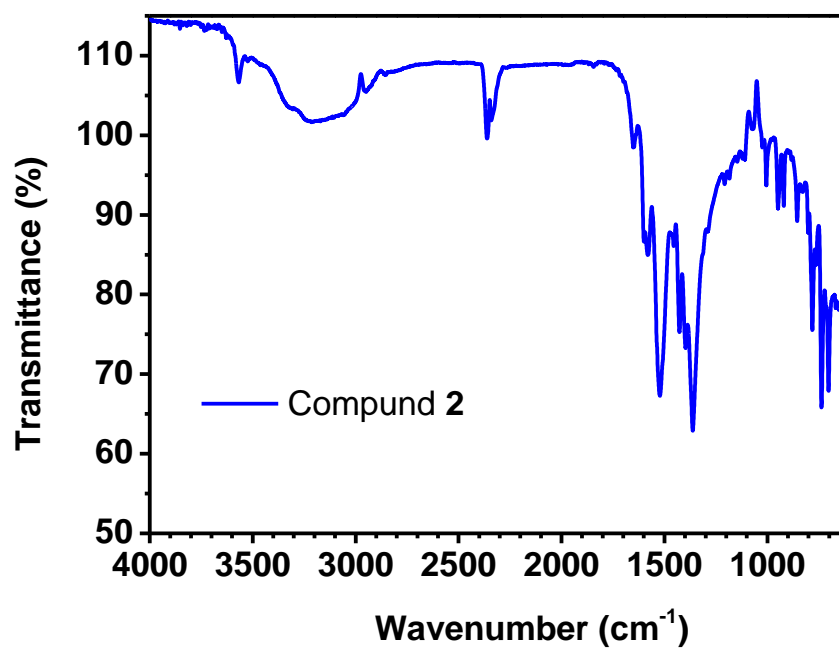

**Fig. S9** FTIR spectrum of compound 2.

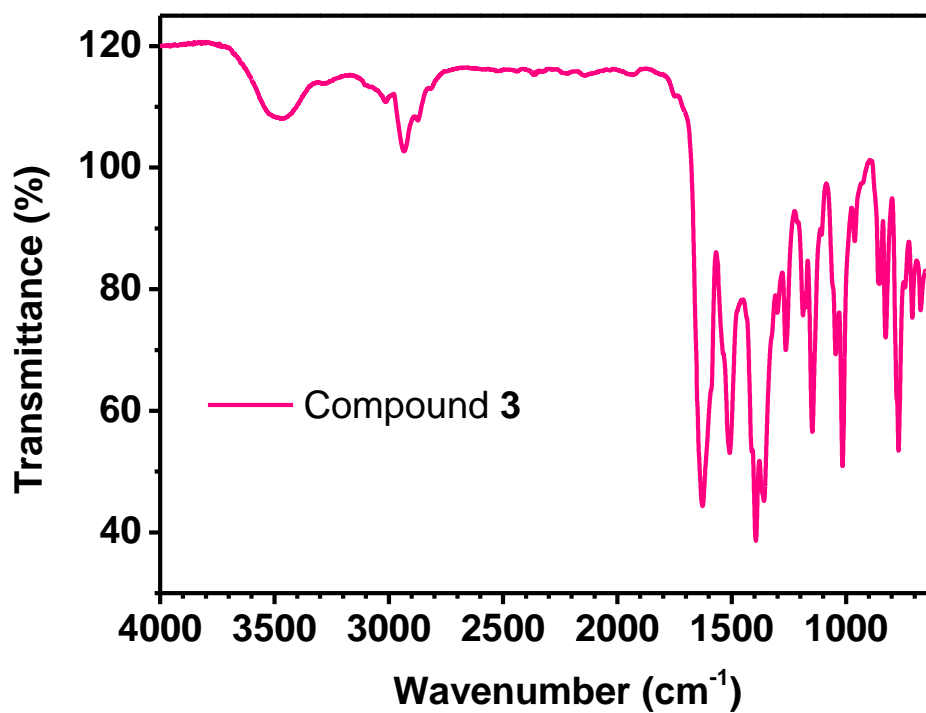

**Fig. S10** FTIR spectrum of compound 3.

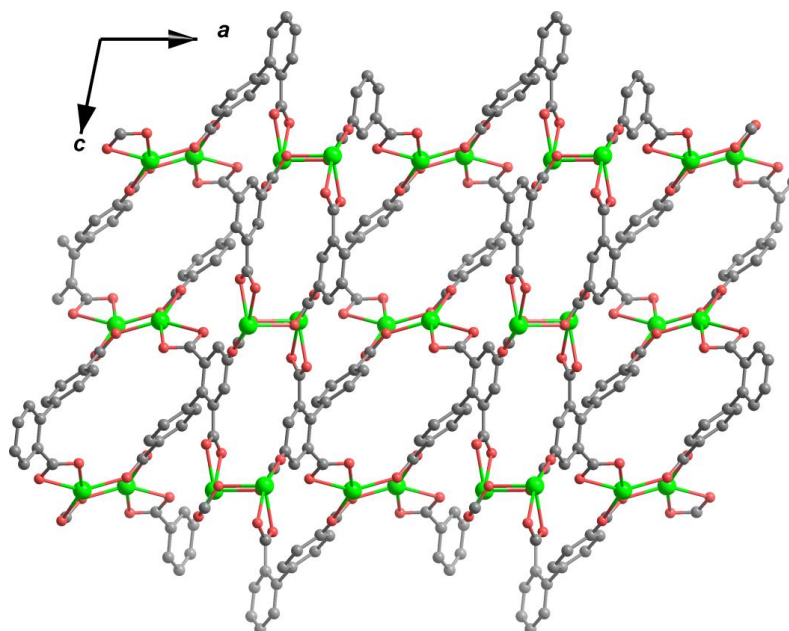

**Fig. S11** The single **lvt** net in compound **2**. The coordinated and free water molecules are omitted for clarity. Colour code: green, cadmium; red, oxygen; gray, carbon.

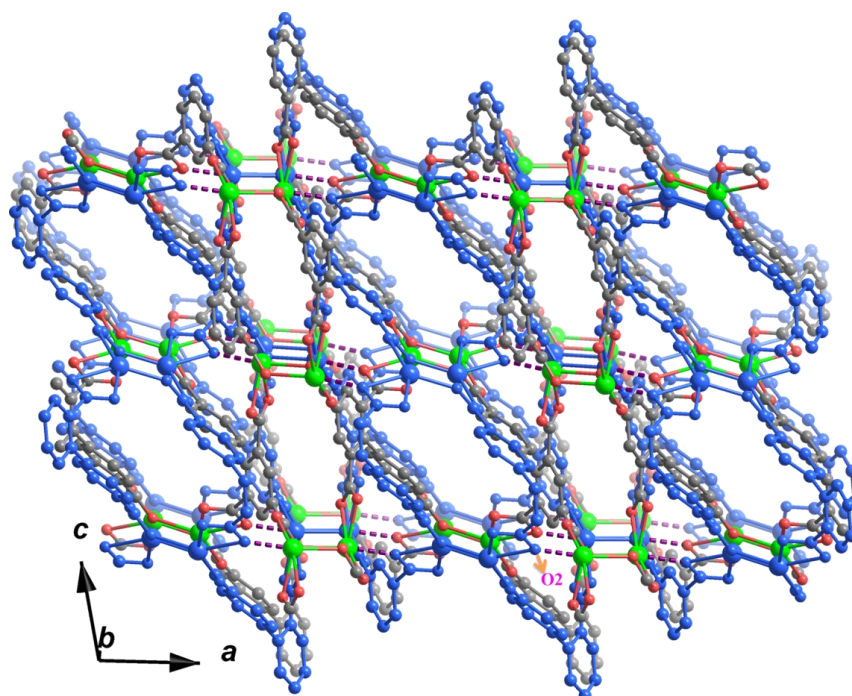

**Fig. S12** The 3D structure of compound **2**, which is clearly showing the self-interpenetrated structural feature. The purple dot lines represent the Cd2 – O2 bonds and blue framework shows one single **lvt** net as in Fig. S11. The coordinated and free water molecules are omitted for clarity. Colour code: green, cadmium; red, oxygen; gray, carbon.



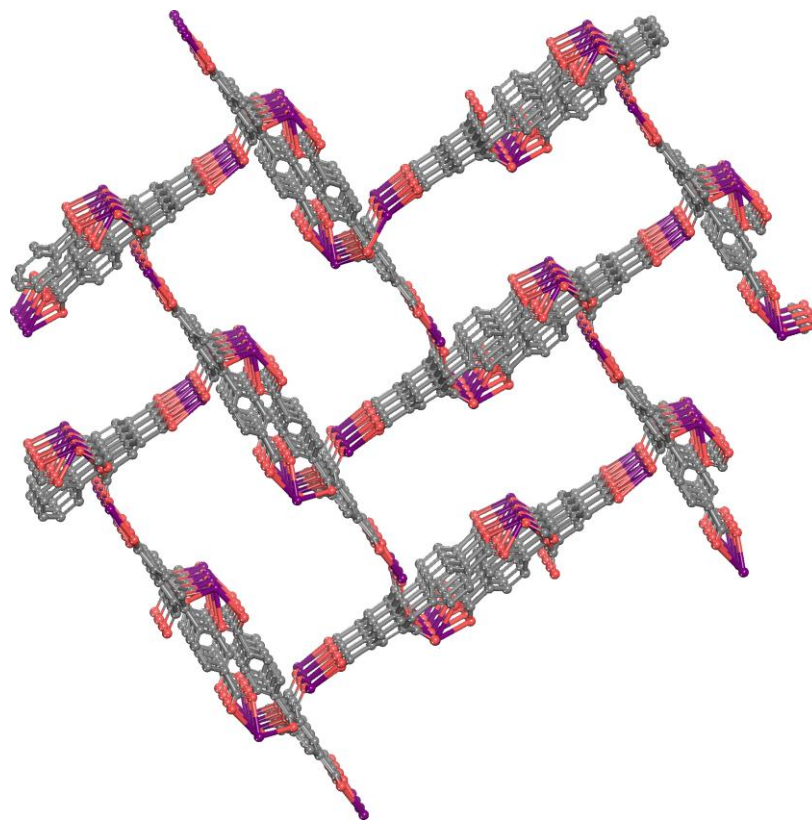

**Fig. S13** Ball-and-stick representative 3D structure of compound **3** after removing the coordinated DMA ligands, showing the 1D squeezed rectangular channel along *a*-axis. Colour code: purple, lead; red, oxygen; gray, carbon.

### X-ray Crystallography

Crystallographic data of **1** and **3** were collected on a Bruker SMART APEX-II CCD diffractometer and that of **2** was collected on an Oxford diffraction Gemini E diffractometer with Mo-K $\alpha$  radiation ( $\lambda = 0.071073\text{\AA}$ ) at ambient temperature. The data were corrected for Lorentz-polarization factors as well as for absorption. Structures were solved by direct methods and refined by full-matrix least-squares methods on  $F^2$  with the SHELX-97 program.<sup>1</sup> All non-hydrogen atoms were refined anisotropically, while hydrogen atoms were placed in geometrically calculated positions. In compound **3**, the coordinated solvent molecules of DMA are disordered and refined using constraints. Selected bond distances and bond angles are given in Table S1. Crystal data and refinement conditions are shown in Tables S2–S4.

| Table S1 Selected bond lengths (Å) and bond angles (°) in compounds <b>1-3</b> . |           |             |            |             |            |
|----------------------------------------------------------------------------------|-----------|-------------|------------|-------------|------------|
| <b>1</b>                                                                         |           | <b>2</b>    |            | <b>3</b>    |            |
| Zn1-O1                                                                           | 1.909(2)  | Cd1-O1      | 2.344(3)   | Pb1-O1      | 2.418(4)   |
| Zn1-O2                                                                           | 1.974(2)  | Cd1-O2      | 2.410(2)   | Pb1-O3a     | 2.378(5)   |
| Zn1-O3                                                                           | 1.963(2)  | Cd1-O7a     | 2.219(3)   | Pb1-O4a     | 2.712(5)   |
| Zn1-O4                                                                           | 1.933(2)  | Cd1-O8b     | 2.220(3)   | Pb1-O9      | 2.488(5)   |
| O1-Zn1-O4                                                                        | 131.19(8) | Cd1-O9      | 2.323(3)   | Pb1-O2      | 2.818(4)   |
| O1-Zn1-O3                                                                        | 106.43(8) | Cd1-O10     | 2.280(3)   | Pb1-O10     | 2.625(6)   |
| O4-Zn1-O3                                                                        | 109.41(7) | Cd2-O2c     | 2.341(2)   | Pb2-O2      | 2.634(5)   |
| O1-Zn1-O2                                                                        | 109.23(8) | Cd2-O3d     | 2.316(3)   | Pb2-O5b     | 2.508(4)   |
| O4-Zn1-O2                                                                        | 94.96(7)  | Cd2-O4      | 2.218(2)   | Pb2-O6b     | 2.508(4)   |
| O3-Zn1-O2                                                                        | 101.47(7) | Cd2-O5e     | 2.251(3)   | Pb2-O7c     | 2.327(4)   |
|                                                                                  |           | Cd2-O6e     | 2.473(3)   | Pb2-O8c     | 2.741(5)   |
|                                                                                  |           | Cd2-O11     | 2.265(3)   | Pb2-O11     | 2.703(11)  |
|                                                                                  |           | O1-Cd1-O10  | 87.39(10)  | Pb2-O13     | 2.929(9)   |
|                                                                                  |           | O1-Cd1-O8b  | 146.91(11) | O1-Pb1-O3a  | 82.81(16)  |
|                                                                                  |           | O9-Cd1-O8b  | 93.58(11)  | O1-Pb1-O4a  | 132.72(16) |
|                                                                                  |           | O1-Cd1-O9   | 89.39(11)  | O3a-Pb1-O4a | 50.94(15)  |
|                                                                                  |           | O1-Cd1-O2   | 54.60(8)   | O1-Pb1-O9   | 83.9(2)    |
|                                                                                  |           | O1-Cd1-O7a  | 92.02(10)  | O1-Pb1-O10  | 75.3(2)    |
|                                                                                  |           | O4-Cd2-O5e  | 112.34(10) | O2-Pb2-O5b  | 77.71(14)  |
|                                                                                  |           | O5e-Cd2-O6e | 54.79(9)   | O5b-Pb2-O6b | 51.91(15)  |
|                                                                                  |           | O6e-Cd2-O11 | 101.46(10) | O11-Pb2-O6b | 73.8(3)    |
|                                                                                  |           | O4-Cd2-O11  | 91.58(10)  | O8c-Pb2-O6b | 122.77(17) |
|                                                                                  |           | O2c-Cd2-O11 | 89.30(10)  | O5b-Pb2-O8c | 130.88(17) |
|                                                                                  |           | O3d-Cd2-O11 | 82.07(10)  | O2-Pb2-O7c  | 85.11(18)  |
|                                                                                  |           |             |            | O2-Pb2-O13  | 97.1(2)    |

Symmetry code in compound **2**: a = 1-x, y, 1.5-z; b = x, 1-y, -0.5+z; c = x, 1+y, z; d = 2-x, 3-y, 1-z; e = x, 3-y, -0.5+z.

Symmetry code in compound **3**: a = 1-x, -0.5 +y, 1.5-z; b = 1+x, y, z; c = 0.5 + x, 0.5-y, 2-z.

| <b>Table S2</b> Crystal data and structure refinement for compound <b>1</b> . |                                                                                                                      |
|-------------------------------------------------------------------------------|----------------------------------------------------------------------------------------------------------------------|
| Empirical formula                                                             | C <sub>16</sub> H <sub>6</sub> O <sub>8</sub> Zn <sub>2</sub>                                                        |
| Formula weight                                                                | 456.95                                                                                                               |
| Temperature                                                                   | 296(2) K                                                                                                             |
| Wavelength                                                                    | 0.71073 Å                                                                                                            |
| Crystal system, space group                                                   | Monoclinic, C2/c                                                                                                     |
| Unit cell dimensions                                                          | a = 12.213(5) Å    alpha = 90 deg.<br>b = 14.723(6) Å    beta = 108.105(4) deg.<br>c = 8.994(4) Å    gamma = 90 deg. |
| Volume                                                                        | 1537.1(10) Å <sup>3</sup>                                                                                            |
| Z, Calculated density                                                         | 4, 1.975 Mg/m <sup>3</sup>                                                                                           |
| Absorption coefficient                                                        | 3.167 mm <sup>-1</sup>                                                                                               |
| F(000)                                                                        | 904                                                                                                                  |
| Crystal size                                                                  | 0.23 x 0.16 x 0.11 mm                                                                                                |
| Theta range for data collection                                               | 2.77 to 25.49 deg.                                                                                                   |
| Limiting indices                                                              | -14<=h<=14, -17<=k<=17, -10<=l<=10                                                                                   |
| Reflections collected / unique                                                | 5276 / 1440 [R(int) = 0.0258]                                                                                        |
| Completeness to theta = 25.49                                                 | 99.9 %                                                                                                               |
| Max. and min. transmission                                                    | 0.7221 and 0.5296                                                                                                    |
| Refinement method                                                             | Full-matrix least-squares on F <sup>2</sup>                                                                          |
| Data / restraints / parameters                                                | 1440 / 0 / 121                                                                                                       |
| Goodness-of-fit on F <sup>2</sup>                                             | 1.052                                                                                                                |
| Final R indices [I>2sigma(I)]                                                 | R1 = 0.0222, wR2 = 0.0496                                                                                            |
| R indices (all data)                                                          | R1 = 0.0278, wR2 = 0.0518                                                                                            |
| Largest diff. peak and hole                                                   | 0.343 and -0.290 e.Å <sup>-3</sup>                                                                                   |

| <b>Table S3</b> Crystal data and structure refinement for compound <b>2</b> . |                                                                                                                         |
|-------------------------------------------------------------------------------|-------------------------------------------------------------------------------------------------------------------------|
| Empirical formula                                                             | C <sub>16</sub> H <sub>14</sub> Cd <sub>2</sub> O <sub>12</sub>                                                         |
| Formula weight                                                                | 623.07                                                                                                                  |
| Temperature                                                                   | 291.15K                                                                                                                 |
| Wavelength                                                                    | 0.71073 Å                                                                                                               |
| Crystal system, space group                                                   | Monoclinic, P2/c                                                                                                        |
| Unit cell dimensions                                                          | a = 12.8567(3) Å    alpha = 90 deg.<br>b = 8.9378(2) Å    beta = 101.613(2). deg<br>c = 16.0555(4) Å    gamma = 90 deg. |
| Volume                                                                        | 1807.17(7) Å <sup>3</sup>                                                                                               |
| Z, Calculated density                                                         | 4, 2.290mg/mm <sup>3</sup>                                                                                              |
| Absorption coefficient                                                        | Multi-scan                                                                                                              |
| F(000)                                                                        | 1208.0                                                                                                                  |
| Crystal size                                                                  | 0.2mm × 0.19mm × 0.18mm                                                                                                 |
| Theta range for data collection                                               | 5.88 to 52.74°                                                                                                          |
| Limiting indices                                                              | -16 ≤ h ≤ 9, -9 ≤ k ≤ 11, -20 ≤ l ≤ 20                                                                                  |
| Reflections collected / unique                                                | 7811/ 3680[R(int) = 0.0226]                                                                                             |
| Completeness to theta = 26.32                                                 | 99.77                                                                                                                   |
| Max. and min. transmission                                                    | 1and 0.95869                                                                                                            |
| Refinement method                                                             | Full-matrix least-squares on F <sup>2</sup>                                                                             |
| Data / restraints / parameters                                                | 3680/4/272                                                                                                              |
| Goodness-of-fit on F <sup>2</sup>                                             | 1.069                                                                                                                   |
| Final R indices [I>2sigma(I)]                                                 | R <sub>1</sub> = 0.0301, wR <sub>2</sub> = 0.0624                                                                       |
| R indices (all data)                                                          | R <sub>1</sub> = 0.0381, wR <sub>2</sub> = 0.0661                                                                       |
| Largest diff. peak and hole                                                   | 0.88/-0.69 e Å <sup>-3</sup>                                                                                            |

| <b>Table S4</b> Crystal data and structure refinement for compound <b>3</b> . |                                                                                                                   |
|-------------------------------------------------------------------------------|-------------------------------------------------------------------------------------------------------------------|
| Empirical formula                                                             | C <sub>32</sub> H <sub>42</sub> N <sub>4</sub> O <sub>12</sub> Pb <sub>2</sub>                                    |
| Formula weight                                                                | 1089.08                                                                                                           |
| Temperature                                                                   | 296(2) K                                                                                                          |
| Wavelength                                                                    | 0.71073 Å                                                                                                         |
| Crystal system, space group                                                   | Orthorhombic, P2(1)2(1)2(1)                                                                                       |
| Unit cell dimensions                                                          | a = 10.1447(7) Å    alpha = 90 deg.<br>b = 13.8559(9) Å    beta = 90 deg.<br>c = 26.1423(17) Å    gamma = 90 deg. |
| Volume                                                                        | 3674.7(4) Å <sup>3</sup>                                                                                          |
| Z, Calculated density                                                         | 4, 1.969 Mg/m <sup>3</sup>                                                                                        |
| Absorption coefficient                                                        | 9.216 mm <sup>-1</sup>                                                                                            |
| F(000)                                                                        | 2088                                                                                                              |
| Crystal size                                                                  | 0.18 x 0.12 x 0.11 mm                                                                                             |
| Theta range for data collection                                               | 2.49 to 25.50 deg.                                                                                                |
| Limiting indices                                                              | -12<=h<=12, -16<=k<=16, -31<=l<=31                                                                                |
| Reflections collected / unique                                                | 27493 / 6834 [R(int) = 0.0312]                                                                                    |
| Completeness to theta = 25.50                                                 | 99.9 %                                                                                                            |
| Max. and min. transmission                                                    | 0.4305 and 0.2878                                                                                                 |
| Refinement method                                                             | Full-matrix least-squares on F <sup>2</sup>                                                                       |
| Data / restraints / parameters                                                | 6834 / 188 / 435                                                                                                  |
| Goodness-of-fit on F <sup>2</sup>                                             | 1.046                                                                                                             |
| Final R indices [I>2sigma(I)]                                                 | R1 = 0.0271, wR2 = 0.0666                                                                                         |
| R indices (all data)                                                          | R1 = 0.0303, wR2 = 0.0680                                                                                         |
| Largest diff. peak and hole                                                   | 0.622 and -0.509 e.Å <sup>-3</sup>                                                                                |

## References

1. G. M. Sheldrick, *SHELXL-97, Program for refinement of crystal structure*, University of Göttingen, Germany, 1997.
